# Supplementary material for: Integrated single-cell and bulk RNA sequencing revealed the molecular characteristics and prognostic roles of neutrophils in pancreatic cancer
Source: Aging (Albany NY). 2023 Sep 19;15(18):9718–42. doi: 10.18632/aging.205044 (PMC10564426; doi:10.18632/aging.205044)
Supplement: Supplementary Table 1 [file aging-15-205044-s002.xls]

Supplementary Table 1. Single-cell analysis identified 350 neutrophil-related genes (NRGs).
p_val	avg_log2FC	pct.1	pct.2	p_val_adj	cluster	gene
0	5.958281846	0.83	0.034	0	Neutrophils	G0S2
0	5.524073544	0.748	0.044	0	Neutrophils	S100A9
0	5.509995922	0.822	0.172	0	Neutrophils	CXCL8
0	5.173408616	0.585	0.021	0	Neutrophils	S100A8
0	4.935258213	0.933	0.122	0	Neutrophils	SRGN
0	4.934755874	0.675	0.022	0	Neutrophils	BCL2A1
0	4.644350739	0.722	0.057	0	Neutrophils	ALOX5AP
0	4.494036409	0.557	0.022	0	Neutrophils	FCGR3B
0	4.491072963	0.63	0.025	0	Neutrophils	FPR1
0	4.320474891	0.566	0.039	0	Neutrophils	BASP1
0	4.293020444	0.521	0.013	0	Neutrophils	CSF3R
0	4.231747042	0.433	0.004	0	Neutrophils	CXCR2
0	4.195884151	0.872	0.289	0	Neutrophils	IFITM2
0	4.176471468	0.531	0.083	0	Neutrophils	RGS2
0	4.067127731	0.407	0.019	0	Neutrophils	OSM
0	4.043938997	0.394	0.02	0	Neutrophils	PLEK
0	4.012387018	0.404	0.014	0	Neutrophils	ST20
0	3.863382067	0.482	0.053	0	Neutrophils	SLC2A3
0	3.702983224	0.806	0.242	0	Neutrophils	NAMPT
0	3.70078034	0.372	0.013	0	Neutrophils	AQP9
0	3.622622041	0.355	0.013	0	Neutrophils	TREM1
0	3.538775662	0.455	0.033	0	Neutrophils	FCGR3A
0	3.471846614	0.51	0.044	0	Neutrophils	LSP1
0	3.467095948	0.746	0.241	0	Neutrophils	CEBPB
0	3.424218932	0.533	0.052	0	Neutrophils	LCP1
0	3.417960859	0.745	0.223	0	Neutrophils	SOD2
0	3.395550998	0.764	0.292	0	Neutrophils	LITAF
0	3.337575634	0.457	0.038	0	Neutrophils	SPI1
0	3.01914488	0.974	0.568	0	Neutrophils	FTH1
0	2.943081094	0.538	0.062	0	Neutrophils	TYROBP
0	2.867320466	0.631	0.086	0	Neutrophils	LAPTM5
2.17E-306	3.575469913	0.349	0.014	3.48E-302	Neutrophils	RIPOR2
7.03E-275	3.50526101	0.342	0.02	1.13E-270	Neutrophils	SELL
4.60E-268	2.73924395	0.763	0.371	7.37E-264	Neutrophils	JUNB
4.61E-265	3.406270155	0.284	0.007	7.39E-261	Neutrophils	FPR2
4.04E-255	2.489097419	0.788	0.411	6.47E-251	Neutrophils	SAT1
1.70E-254	3.442580238	0.551	0.141	2.73E-250	Neutrophils	SLC25A37
2.02E-247	3.581431874	0.284	0.011	3.25E-243	Neutrophils	FFAR2
4.17E-245	3.487429315	0.252	0.004	6.69E-241	Neutrophils	HCAR3
1.39E-240	3.308546904	0.335	0.028	2.23E-236	Neutrophils	C5AR1
2.63E-239	3.363669145	0.345	0.032	4.21E-235	Neutrophils	LCP2
4.28E-239	4.397488201	0.307	0.019	6.87E-235	Neutrophils	IL1B
1.10E-232	3.145882504	0.293	0.017	1.76E-228	Neutrophils	LST1
1.41E-232	3.070037697	0.483	0.104	2.26E-228	Neutrophils	MXD1
8.01E-229	1.453678011	0.818	0.463	1.28E-224	Neutrophils	FTL
2.98E-225	3.264200962	0.523	0.139	4.77E-221	Neutrophils	BTG2
1.78E-216	3.484412952	0.398	0.061	2.86E-212	Neutrophils	CXCR4
1.84E-213	2.344712603	0.748	0.421	2.95E-209	Neutrophils	DUSP1
1.83E-210	2.921404514	0.342	0.041	2.94E-206	Neutrophils	HCLS1
1.64E-202	2.960968006	0.319	0.036	2.64E-198	Neutrophils	ACSL1
3.61E-200	2.795859825	0.269	0.019	5.79E-196	Neutrophils	NCF2
1.46E-198	2.977279286	0.306	0.032	2.33E-194	Neutrophils	GMFG
1.51E-198	2.995203941	0.37	0.059	2.41E-194	Neutrophils	TNFRSF1B
3.02E-197	-3.173510294	0.04	0.567	4.85E-193	Neutrophils	RPS12
1.72E-195	3.174976469	0.325	0.042	2.75E-191	Neutrophils	GCA
8.49E-195	3.321938517	0.433	0.1	1.36E-190	Neutrophils	IVNS1ABP
4.01E-191	3.045903498	0.322	0.041	6.43E-187	Neutrophils	IL1R2
9.03E-189	2.890578891	0.271	0.023	1.45E-184	Neutrophils	SAMSN1
7.59E-187	3.053794647	0.263	0.021	1.22E-182	Neutrophils	FGR
2.60E-185	-3.525114203	0.034	0.532	4.17E-181	Neutrophils	ANXA2
6.06E-185	3.262696528	0.339	0.051	9.72E-181	Neutrophils	PTGS2
6.38E-184	2.839794935	0.569	0.228	1.02E-179	Neutrophils	PNRC1
2.46E-177	2.591402858	0.273	0.027	3.94E-173	Neutrophils	HCK
4.97E-177	2.870819084	0.253	0.021	7.97E-173	Neutrophils	SLC11A1
1.82E-175	-2.909935793	0.062	0.557	2.92E-171	Neutrophils	TMSB10
2.61E-169	2.800968425	0.294	0.039	4.19E-165	Neutrophils	GPSM3
5.85E-166	-2.953931064	0.047	0.524	9.38E-162	Neutrophils	RPS19
1.29E-165	-2.792543106	0.052	0.529	2.07E-161	Neutrophils	RPL37A
6.27E-165	2.647680803	0.309	0.046	1.00E-160	Neutrophils	CD53
1.51E-163	2.950088673	0.611	0.311	2.43E-159	Neutrophils	NFKBIA
1.31E-160	4.369091578	0.263	0.03	2.10E-156	Neutrophils	CCL4L2
2.12E-158	2.686271865	0.257	0.028	3.40E-154	Neutrophils	SLA
3.75E-153	-3.856863554	0.033	0.463	6.01E-149	Neutrophils	KRT19
7.56E-153	-2.982161636	0.037	0.482	1.21E-148	Neutrophils	RPL13
7.72E-153	-4.387201109	0.024	0.452	1.24E-148	Neutrophils	LCN2
2.61E-150	-2.398263706	0.087	0.544	4.19E-146	Neutrophils	RPL27A
6.22E-148	-3.987476673	0.023	0.442	9.97E-144	Neutrophils	CEACAM6
7.80E-148	-2.457272514	0.074	0.528	1.25E-143	Neutrophils	RPLP2
2.12E-147	2.643786463	0.318	0.06	3.39E-143	Neutrophils	RAC2
7.64E-147	2.464352209	0.279	0.042	1.22E-142	Neutrophils	ARRB2
1.73E-146	-2.546078424	0.057	0.505	2.77E-142	Neutrophils	RPL8
2.93E-145	-3.355311289	0.022	0.44	4.69E-141	Neutrophils	IFI27
5.30E-145	-3.28021323	0.017	0.435	8.50E-141	Neutrophils	HSPB1
8.41E-145	1.742344951	0.75	0.518	1.35E-140	Neutrophils	FOS
1.37E-144	3.886268431	0.254	0.032	2.19E-140	Neutrophils	CCL4
2.49E-143	1.596188391	0.755	0.536	4.00E-139	Neutrophils	H3F3B
3.23E-142	-3.304034012	0.019	0.432	5.18E-138	Neutrophils	S100A10
5.37E-141	-3.144915405	0.017	0.427	8.62E-137	Neutrophils	RPS4X
3.15E-140	2.416506021	0.577	0.278	5.05E-136	Neutrophils	IER3
1.06E-139	-2.818576825	0.036	0.455	1.69E-135	Neutrophils	RPL15
5.24E-138	-3.64542073	0.047	0.453	8.41E-134	Neutrophils	CLDN4
2.04E-136	-2.870164939	0.046	0.463	3.27E-132	Neutrophils	RPS6
1.19E-135	2.481613087	0.263	0.04	1.91E-131	Neutrophils	PTPRC
3.08E-134	-3.122561322	0.01	0.403	4.93E-130	Neutrophils	GSTP1
3.00E-132	-3.928297949	0.024	0.414	4.80E-128	Neutrophils	TFF3
1.26E-131	-2.404207008	0.054	0.469	2.02E-127	Neutrophils	RPS14
2.90E-131	-2.59133211	0.041	0.445	4.66E-127	Neutrophils	RPL13A
5.00E-131	4.206231603	0.396	0.127	8.01E-127	Neutrophils	IL1RN
4.58E-130	-2.521864305	0.051	0.459	7.35E-126	Neutrophils	RPS3
1.00E-129	-3.432837236	0.014	0.397	1.61E-125	Neutrophils	ELF3
9.34E-129	-2.28059115	0.093	0.516	1.50E-124	Neutrophils	RPLP1
5.75E-128	-2.037179546	0.125	0.552	9.21E-124	Neutrophils	RPS29
1.52E-126	-2.244963761	0.06	0.468	2.44E-122	Neutrophils	RPS16
2.73E-126	-2.405303397	0.035	0.43	4.37E-122	Neutrophils	RPL18
4.67E-125	-2.411226197	0.063	0.466	7.49E-121	Neutrophils	RPL11
2.02E-124	-1.89516532	0.36	0.69	3.24E-120	Neutrophils	S100A6
6.92E-122	-2.382839378	0.063	0.461	1.11E-117	Neutrophils	RPS27A
1.18E-121	-3.132450789	0.008	0.369	1.89E-117	Neutrophils	LMNA
1.46E-121	-2.999714776	0.029	0.404	2.33E-117	Neutrophils	ATP1B1
1.16E-120	-2.395671373	0.057	0.449	1.86E-116	Neutrophils	RPL19
2.07E-119	2.363196903	0.51	0.242	3.32E-115	Neutrophils	GLUL
3.19E-119	-2.266535694	0.086	0.488	5.11E-115	Neutrophils	RPS11
8.49E-119	-2.096631155	0.1	0.504	1.36E-114	Neutrophils	RPL28
1.60E-118	2.552996299	0.418	0.157	2.57E-114	Neutrophils	LYN
3.79E-118	-2.294742264	0.086	0.484	6.07E-114	Neutrophils	RPL37
4.42E-118	-3.5238653	0.014	0.371	7.09E-114	Neutrophils	TSPAN8
2.79E-117	-3.032496934	0.041	0.406	4.48E-113	Neutrophils	EEF1A1
4.98E-117	-2.5704902	0.028	0.396	7.98E-113	Neutrophils	ATP1A1
6.17E-117	2.586684811	0.416	0.158	9.89E-113	Neutrophils	RNF149
2.19E-116	-3.130784705	0.024	0.382	3.52E-112	Neutrophils	CD24
5.36E-116	-3.842071899	0.028	0.383	8.60E-112	Neutrophils	TFF1
5.50E-116	-2.166226751	0.072	0.463	8.81E-112	Neutrophils	RPS24
7.44E-115	1.747421544	0.657	0.415	1.19E-110	Neutrophils	IFITM3
3.15E-113	2.347537747	0.508	0.252	5.06E-109	Neutrophils	IER2
1.16E-112	2.900479309	0.33	0.092	1.86E-108	Neutrophils	TNFAIP3
1.29E-112	-2.424826302	0.016	0.366	2.07E-108	Neutrophils	RPL35
2.74E-112	-2.25477238	0.045	0.413	4.39E-108	Neutrophils	RPL31
4.14E-112	-3.223522083	0.017	0.362	6.63E-108	Neutrophils	ANXA4
6.15E-112	-3.16288946	0.011	0.354	9.86E-108	Neutrophils	KRT8
2.53E-111	-3.297470926	0.006	0.343	4.05E-107	Neutrophils	MUC1
4.08E-111	-2.377369782	0.012	0.355	6.54E-107	Neutrophils	CALR
2.05E-110	-3.086451293	0.022	0.367	3.29E-106	Neutrophils	TM4SF1
3.09E-110	-2.276807352	0.028	0.383	4.95E-106	Neutrophils	HSP90AB1
1.44E-109	-2.085234109	0.06	0.431	2.30E-105	Neutrophils	CST3
1.30E-108	-2.671579338	0.008	0.34	2.08E-104	Neutrophils	ITGB1
4.07E-108	-2.19534559	0.057	0.419	6.53E-104	Neutrophils	PTMA
4.47E-108	-2.576009264	0.01	0.345	7.16E-104	Neutrophils	RPLP0
1.06E-107	-2.346012347	0.022	0.364	1.70E-103	Neutrophils	RPS5
2.76E-107	-2.512197421	0.025	0.369	4.43E-103	Neutrophils	RPS8
3.03E-107	2.909385564	0.3	0.08	4.86E-103	Neutrophils	FAM177B
3.13E-107	-1.9292548	0.041	0.399	5.01E-103	Neutrophils	LGALS3
3.15E-107	-2.908279052	0.004	0.331	5.05E-103	Neutrophils	APP
3.99E-105	-2.509049682	0.022	0.357	6.40E-101	Neutrophils	RPS23
4.01E-105	-2.839443537	0.017	0.348	6.43E-101	Neutrophils	RPL3
5.65E-105	-2.361240144	0.024	0.364	9.05E-101	Neutrophils	RPL12
7.44E-105	-2.280688152	0.026	0.367	1.19E-100	Neutrophils	EEF2
3.24E-104	2.643869785	0.319	0.093	5.19E-100	Neutrophils	TSC22D3
3.54E-104	-2.975759125	0.009	0.332	5.67E-100	Neutrophils	EPCAM
1.53E-103	-3.205877895	0.015	0.34	2.46E-99	Neutrophils	TACSTD2
1.83E-103	-3.367237792	0.024	0.351	2.94E-99	Neutrophils	DUOX2
3.78E-103	-2.633299156	0.013	0.337	6.05E-99	Neutrophils	RPS21
9.00E-103	-2.874803291	0.004	0.321	1.44E-98	Neutrophils	PERP
2.19E-102	-2.551711285	0.009	0.328	3.51E-98	Neutrophils	RPL10A
2.90E-102	-1.876947535	0.088	0.459	4.64E-98	Neutrophils	RPL30
3.25E-102	-2.583077231	0.007	0.324	5.21E-98	Neutrophils	SPTBN1
9.21E-102	-2.104958178	0.036	0.376	1.48E-97	Neutrophils	RPL27
4.49E-101	-3.086314255	0.017	0.338	7.20E-97	Neutrophils	SPINK1
9.71E-101	-2.203057029	0.037	0.375	1.56E-96	Neutrophils	RPL14
1.36E-100	-3.245895377	0.018	0.338	2.18E-96	Neutrophils	PIGR
2.49E-100	-2.232806676	0.039	0.377	4.00E-96	Neutrophils	RPS13
3.10E-100	2.41997791	0.25	0.055	4.97E-96	Neutrophils	VSIR
6.63E-100	2.327174669	0.324	0.1	1.06E-95	Neutrophils	FAM49B
3.83E-99	-2.65579405	0.029	0.353	6.13E-95	Neutrophils	RPL10
1.16E-98	-1.723232247	0.107	0.472	1.87E-94	Neutrophils	HSP90AA1
1.93E-98	-2.131001864	0.038	0.371	3.10E-94	Neutrophils	RPL32
6.51E-98	-2.976182559	0.003	0.307	1.04E-93	Neutrophils	LGALS4
1.16E-97	-2.236731169	0.017	0.334	1.86E-93	Neutrophils	RACK1
7.01E-97	-2.972920904	0.003	0.302	1.12E-92	Neutrophils	CLDN7
7.69E-97	-3.370194158	0.018	0.325	1.23E-92	Neutrophils	TM4SF4
3.31E-96	-2.566638582	0.01	0.314	5.31E-92	Neutrophils	LGALS3BP
5.48E-96	-2.508109789	0.014	0.322	8.78E-92	Neutrophils	EZR
5.71E-96	-2.650186564	0.01	0.315	9.15E-92	Neutrophils	GOLM1
5.93E-96	2.563330733	0.338	0.116	9.50E-92	Neutrophils	CSRNP1
2.84E-94	-2.291515685	0.017	0.323	4.56E-90	Neutrophils	RPS20
5.15E-94	-2.20970589	0.03	0.345	8.26E-90	Neutrophils	RPL7A
1.13E-93	-2.122439005	0.023	0.334	1.81E-89	Neutrophils	HSP90B1
1.42E-93	-2.710869755	0.007	0.302	2.27E-89	Neutrophils	CDH1
6.46E-93	-2.982920877	0.013	0.31	1.04E-88	Neutrophils	ANXA1
9.19E-93	-1.690564725	0.061	0.399	1.47E-88	Neutrophils	RPL38
1.74E-92	-3.016284495	0.007	0.299	2.79E-88	Neutrophils	LMO7
7.86E-92	1.578400406	0.612	0.42	1.26E-87	Neutrophils	ITM2B
1.19E-91	-2.291490076	0.016	0.315	1.91E-87	Neutrophils	TSPAN3
2.19E-91	-2.577021828	0.017	0.315	3.50E-87	Neutrophils	RPS18
2.67E-91	-3.030992045	0.009	0.299	4.28E-87	Neutrophils	AGR2
5.28E-91	2.39118672	0.252	0.063	8.46E-87	Neutrophils	VNN2
7.93E-91	-1.819544582	0.076	0.416	1.27E-86	Neutrophils	RPL23
1.36E-89	-2.411409259	0.006	0.291	2.18E-85	Neutrophils	AHNAK
3.93E-89	-2.700794132	0.007	0.291	6.30E-85	Neutrophils	KRT18
1.52E-87	-2.859936841	0.006	0.285	2.44E-83	Neutrophils	GPRC5A
1.68E-87	-1.589463551	0.045	0.359	2.69E-83	Neutrophils	P4HB
1.63E-86	-2.631252126	0.01	0.289	2.61E-82	Neutrophils	PDZK1IP1
3.81E-86	-1.72907649	0.07	0.393	6.11E-82	Neutrophils	RPS28
3.97E-86	-2.096270268	0.056	0.365	6.37E-82	Neutrophils	CD59
4.68E-86	-2.163680378	0.015	0.299	7.50E-82	Neutrophils	PPDPF
7.91E-86	-2.209850256	0.009	0.287	1.27E-81	Neutrophils	COX7C
3.75E-85	-2.518954401	0.005	0.278	6.00E-81	Neutrophils	TMC5
1.04E-84	-2.131521603	0.006	0.279	1.66E-80	Neutrophils	NUCKS1
1.53E-84	-2.179788412	0.01	0.287	2.45E-80	Neutrophils	DSTN
1.55E-84	-2.35895021	0.005	0.276	2.49E-80	Neutrophils	JUP
1.63E-84	-2.366260304	0.01	0.287	2.62E-80	Neutrophils	CD9
3.28E-84	2.411064614	0.295	0.097	5.25E-80	Neutrophils	MBOAT7
6.11E-84	-1.992124417	0.033	0.328	9.80E-80	Neutrophils	RPS15
8.11E-84	-2.352420996	0.01	0.283	1.30E-79	Neutrophils	KLF5
3.46E-83	-1.864259622	0.024	0.311	5.55E-79	Neutrophils	PDIA3
4.06E-83	-2.137998891	0.006	0.275	6.51E-79	Neutrophils	CTNND1
7.69E-83	-2.385033456	0.007	0.275	1.23E-78	Neutrophils	SDC4
9.22E-83	-2.336796496	0.016	0.292	1.48E-78	Neutrophils	CTSB
1.36E-82	-1.518683184	0.051	0.357	2.17E-78	Neutrophils	RPL35A
8.11E-82	-2.476207848	0.007	0.273	1.30E-77	Neutrophils	MAL2
1.15E-80	-2.089248545	0.016	0.287	1.85E-76	Neutrophils	PPIA
1.28E-80	-2.842271229	0.004	0.264	2.06E-76	Neutrophils	TSPAN1
1.54E-80	-2.210259637	0.025	0.302	2.47E-76	Neutrophils	RPL7
2.29E-80	-2.145787739	0.003	0.26	3.68E-76	Neutrophils	AES
3.17E-80	-1.976346096	0.003	0.26	5.08E-76	Neutrophils	ITGB4
1.06E-79	-2.190611972	0.007	0.268	1.70E-75	Neutrophils	SELENOW
5.59E-79	-2.303578778	0.008	0.267	8.96E-75	Neutrophils	RPL22
7.47E-79	-2.048808214	0.012	0.275	1.20E-74	Neutrophils	RPL23A
9.84E-79	-2.580825275	0.005	0.26	1.58E-74	Neutrophils	PRSS8
2.37E-78	2.332411416	0.49	0.295	3.80E-74	Neutrophils	ZFP36L1
2.55E-78	-2.107826555	0.007	0.264	4.09E-74	Neutrophils	CAPN2
1.26E-77	-1.94723543	0.043	0.326	2.02E-73	Neutrophils	GSN
1.52E-77	-2.495568212	0.01	0.266	2.44E-73	Neutrophils	SOX4
2.98E-77	-2.063476041	0.02	0.286	4.77E-73	Neutrophils	RPL18A
3.00E-77	-1.236610915	0.087	0.407	4.81E-73	Neutrophils	UBB
4.01E-77	-2.337685698	0.008	0.262	6.42E-73	Neutrophils	KRT7
7.63E-77	-2.15031465	0.006	0.258	1.22E-72	Neutrophils	BACE2
1.37E-76	-2.36571027	0.011	0.267	2.20E-72	Neutrophils	S100A16
5.05E-76	-1.874475531	0.014	0.271	8.10E-72	Neutrophils	RPS15A
5.74E-76	-2.2153883	0.006	0.255	9.21E-72	Neutrophils	RPL5
7.46E-76	-1.866421724	0.023	0.287	1.20E-71	Neutrophils	RPL24
1.24E-75	-1.245068753	0.139	0.473	1.98E-71	Neutrophils	CD63
1.87E-75	-1.631899619	0.031	0.302	3.00E-71	Neutrophils	CAPNS1
4.55E-75	-2.093347881	0.023	0.284	7.29E-71	Neutrophils	RPS7
1.06E-74	-1.871445494	0.036	0.308	1.70E-70	Neutrophils	ARL6IP1
1.38E-74	-2.139457448	0.006	0.252	2.21E-70	Neutrophils	SPATS2L
1.80E-74	-1.772453789	0.02	0.28	2.89E-70	Neutrophils	BTF3
2.89E-74	-1.562742908	0.038	0.313	4.63E-70	Neutrophils	SPINT2
6.24E-74	-2.299451377	0.009	0.255	1.00E-69	Neutrophils	IL32
1.20E-73	-2.030258847	0.008	0.253	1.93E-69	Neutrophils	RPL4
1.95E-73	-1.910004463	0.007	0.25	3.13E-69	Neutrophils	DSG2
4.68E-73	-1.813511882	0.044	0.317	7.50E-69	Neutrophils	CD164
7.33E-73	-1.528076764	0.086	0.384	1.18E-68	Neutrophils	PKM
7.82E-73	-1.966873723	0.017	0.269	1.25E-68	Neutrophils	RPL26
1.02E-72	1.81644755	0.455	0.259	1.64E-68	Neutrophils	SDCBP
1.05E-72	-1.732476416	0.03	0.291	1.68E-68	Neutrophils	TUBB
1.68E-72	-1.545495071	0.021	0.277	2.69E-68	Neutrophils	CANX
1.85E-72	2.153891527	0.284	0.1	2.96E-68	Neutrophils	RHOG
2.42E-72	-1.926909601	0.022	0.276	3.88E-68	Neutrophils	LY6E
2.59E-72	-2.053459778	0.009	0.251	4.14E-68	Neutrophils	MGLL
3.65E-72	-1.590780459	0.045	0.319	5.86E-68	Neutrophils	SYNGR2
4.31E-72	-1.773771269	0.019	0.271	6.90E-68	Neutrophils	RPL36
6.96E-72	-1.783141047	0.018	0.269	1.12E-67	Neutrophils	TRAM1
1.03E-71	-2.269061094	0.018	0.266	1.65E-67	Neutrophils	APOL1
3.01E-71	-2.460104965	0.032	0.287	4.82E-67	Neutrophils	HLA-DRB1
8.76E-71	-1.554115439	0.083	0.372	1.40E-66	Neutrophils	JUN
9.23E-71	-2.341620199	0.011	0.251	1.48E-66	Neutrophils	MUC3A
9.64E-71	-1.742400044	0.057	0.33	1.55E-66	Neutrophils	RPL34
1.14E-70	-1.808802614	0.027	0.28	1.83E-66	Neutrophils	RPS2
2.08E-70	1.900987761	0.41	0.217	3.34E-66	Neutrophils	VASP
2.18E-70	-1.693621825	0.021	0.271	3.49E-66	Neutrophils	YWHAE
4.05E-70	-1.887302305	0.019	0.266	6.49E-66	Neutrophils	HINT1
7.25E-70	-2.197040087	0.055	0.32	1.16E-65	Neutrophils	IFI6
9.55E-70	-1.895020952	0.065	0.336	1.53E-65	Neutrophils	RPS27
1.21E-69	-2.002074756	0.017	0.259	1.94E-65	Neutrophils	TSC22D1
2.14E-69	-2.640387238	0.018	0.258	3.44E-65	Neutrophils	TCN1
9.57E-69	-1.728669758	0.017	0.257	1.53E-64	Neutrophils	CTNNA1
1.42E-68	-1.73385981	0.023	0.269	2.28E-64	Neutrophils	TM9SF3
3.20E-68	-1.629890082	0.026	0.273	5.14E-64	Neutrophils	RPS25
5.73E-68	-1.321781662	0.023	0.267	9.19E-64	Neutrophils	DYNLL1
1.50E-67	-1.974939313	0.016	0.251	2.41E-63	Neutrophils	SOD1
2.02E-67	-1.327683742	0.047	0.312	3.25E-63	Neutrophils	TMBIM1
6.66E-67	-1.495160696	0.032	0.281	1.07E-62	Neutrophils	CAST
8.65E-66	1.988726516	0.46	0.273	1.39E-61	Neutrophils	EGR1
2.83E-65	-1.440989403	0.038	0.289	4.53E-61	Neutrophils	RBM3
6.24E-65	2.104410861	0.298	0.12	1.00E-60	Neutrophils	PELI1
1.72E-64	-1.256534029	0.339	0.586	2.76E-60	Neutrophils	MT-CO1
2.61E-64	-1.604736638	0.06	0.321	4.19E-60	Neutrophils	TUBA1C
2.84E-64	-1.411044781	0.051	0.31	4.56E-60	Neutrophils	CHCHD2
2.87E-64	-1.412069734	0.056	0.316	4.61E-60	Neutrophils	HSPA5
3.41E-64	-1.214840286	0.054	0.315	5.46E-60	Neutrophils	LAPTM4A
5.73E-64	1.610961596	0.25	0.08	9.19E-60	Neutrophils	S100A4
3.71E-63	2.208908411	0.324	0.146	5.95E-59	Neutrophils	TRIB1
1.54E-62	-1.419813737	0.029	0.263	2.47E-58	Neutrophils	KDELR2
1.71E-62	-1.348443748	0.06	0.317	2.74E-58	Neutrophils	PTTG1IP
3.57E-62	1.890027607	0.423	0.243	5.72E-58	Neutrophils	PLAUR
8.65E-62	1.496284411	0.319	0.133	1.39E-57	Neutrophils	COTL1
1.00E-61	1.947046234	0.409	0.235	1.60E-57	Neutrophils	GNAI2
1.70E-61	-1.21890759	0.053	0.305	2.72E-57	Neutrophils	COX4I1
9.87E-61	2.029933899	0.43	0.264	1.58E-56	Neutrophils	H3F3C
1.71E-60	-2.315614518	0.036	0.262	2.74E-56	Neutrophils	SERPING1
1.77E-60	-1.054510433	0.241	0.548	2.84E-56	Neutrophils	GAPDH
2.16E-60	-1.195860024	0.087	0.357	3.46E-56	Neutrophils	CALM1
2.96E-60	-1.471388919	0.029	0.256	4.74E-56	Neutrophils	NACA
3.08E-60	-1.54343685	0.075	0.329	4.95E-56	Neutrophils	RAB11FIP1
3.86E-60	1.677426658	0.261	0.092	6.18E-56	Neutrophils	ARHGDIB
8.83E-60	-1.333343889	0.035	0.266	1.42E-55	Neutrophils	ANXA5
3.83E-59	-1.17908912	0.099	0.37	6.14E-55	Neutrophils	ZFP36L2
4.35E-59	1.522523143	0.486	0.323	6.97E-55	Neutrophils	MCL1
4.98E-59	-1.378782996	0.083	0.339	7.99E-55	Neutrophils	RHOB
1.78E-58	-1.577633888	0.03	0.252	2.85E-54	Neutrophils	SLC25A3
1.36E-57	-1.189389533	0.034	0.259	2.17E-53	Neutrophils	EIF4A2
5.60E-57	-1.202919268	0.031	0.251	8.98E-53	Neutrophils	ZBTB7A
1.30E-56	-1.506282409	0.035	0.255	2.08E-52	Neutrophils	RPL9
1.79E-56	1.286162155	0.559	0.423	2.88E-52	Neutrophils	HLA-E
5.67E-56	-1.204888311	0.188	0.472	9.09E-52	Neutrophils	ACTN4
1.57E-55	-1.016992976	0.092	0.354	2.51E-51	Neutrophils	FAU
2.85E-55	-1.511103969	0.043	0.266	4.57E-51	Neutrophils	TUBB4B
5.86E-55	1.398123224	0.576	0.434	9.39E-51	Neutrophils	ZFP36
6.29E-55	-1.249524406	0.084	0.334	1.01E-50	Neutrophils	RPL39
9.64E-55	2.009592131	0.27	0.111	1.55E-50	Neutrophils	ANP32A
8.07E-53	-1.136151739	0.06	0.291	1.29E-48	Neutrophils	HNRNPA2B1
1.21E-52	-1.385574626	0.055	0.276	1.94E-48	Neutrophils	BIRC3
1.74E-52	-1.048335022	0.068	0.304	2.79E-48	Neutrophils	LDHA
2.30E-50	-1.160293367	0.155	0.423	3.69E-46	Neutrophils	CALM2
7.72E-50	2.154550456	0.347	0.19	1.24E-45	Neutrophils	SOCS3
8.94E-50	-1.32787402	0.126	0.365	1.43E-45	Neutrophils	RPL41
9.10E-50	-1.047267859	0.085	0.323	1.46E-45	Neutrophils	TMEM59
4.53E-49	-1.089036131	0.265	0.54	7.25E-45	Neutrophils	MT-ND5
3.78E-48	2.030766586	0.329	0.178	6.07E-44	Neutrophils	FLOT1
4.75E-48	1.686350688	0.453	0.323	7.62E-44	Neutrophils	H3F3A
1.55E-47	1.528530959	0.474	0.34	2.49E-43	Neutrophils	BTG1
1.04E-46	-1.047669701	0.053	0.26	1.66E-42	Neutrophils	KIF5B
5.68E-46	1.778608856	0.395	0.258	9.11E-42	Neutrophils	CMTM6
6.17E-46	-1.425144241	0.309	0.544	9.90E-42	Neutrophils	LYZ
7.17E-46	2.319034735	0.276	0.132	1.15E-41	Neutrophils	GRINA
8.41E-45	-1.018403185	0.133	0.378	1.35E-40	Neutrophils	YWHAZ
1.03E-44	-1.156265659	0.055	0.255	1.65E-40	Neutrophils	ERO1A
6.22E-42	1.240007136	0.51	0.406	9.96E-38	Neutrophils	OAZ1
5.26E-41	-1.096622048	0.138	0.368	8.43E-37	Neutrophils	TUBA1B
2.69E-39	-1.015630615	0.104	0.314	4.31E-35	Neutrophils	TXN
6.10E-38	-1.260458109	0.08	0.27	9.78E-34	Neutrophils	HLA-DRA
1.97E-37	2.088297923	0.257	0.131	3.15E-33	Neutrophils	ADGRE5
2.56E-37	1.700334726	0.29	0.159	4.10E-33	Neutrophils	UBE2B
4.53E-36	1.918476199	0.373	0.254	7.26E-32	Neutrophils	MARCKS
2.24E-33	1.991370413	0.276	0.155	3.58E-29	Neutrophils	NFKBIZ
9.97E-33	1.578794263	0.365	0.254	1.60E-28	Neutrophils	DAZAP2
8.90E-32	1.706423686	0.353	0.241	1.43E-27	Neutrophils	PPP1R15A
4.08E-28	-1.167304899	0.223	0.401	6.54E-24	Neutrophils	CD74
1.64E-26	1.414001163	0.321	0.216	2.63E-22	Neutrophils	CTSS
3.17E-23	1.559906965	0.289	0.197	5.09E-19	Neutrophils	SLC16A3
2.94E-19	1.306044295	0.258	0.174	4.71E-15	Neutrophils	TALDO1
8.83E-18	1.500959676	0.292	0.219	1.42E-13	Neutrophils	ARPC5
2.42E-17	1.208221194	0.372	0.319	3.87E-13	Neutrophils	CAP1
3.34E-17	1.472574135	0.268	0.193	5.36E-13	Neutrophils	ZYX
7.15E-17	1.356260583	0.286	0.214	1.15E-12	Neutrophils	EFHD2
3.98E-16	1.502378728	0.278	0.205	6.37E-12	Neutrophils	CEBPD
4.76E-15	1.508399892	0.312	0.255	7.63E-11	Neutrophils	BRI3
3.46E-13	1.277849812	0.267	0.201	5.54E-09	Neutrophils	IFITM1
1.10E-12	1.0740782	0.366	0.332	1.76E-08	Neutrophils	ARPC2
3.45E-09	1.268599939	0.25	0.207	5.53E-05	Neutrophils	HIF1A
