# Supplementary material for: Integrated single-cell and bulk RNA sequencing revealed the molecular characteristics and prognostic roles of neutrophils in pancreatic cancer
Source: Aging (Albany NY). 2023 Sep 19;15(18):9718–42. doi: 10.18632/aging.205044 (PMC10564426; doi:10.18632/aging.205044)
Supplement: Supplementary Table 2 [file aging-15-205044-s003.xls]

Supplementary Table 2. Detection of 285 differentially expressed genes across two clusters of neutrophil-related genes (NRGs) using the following criteria: |log2 fold-change (FC)| > 1; adjusted P-value < 0.05.
TSPAN1
LMO7
LIPH
PLS1
TMC5
TMPRSS4
B3GNT3
FA2H
NQO1
MST1R
KCNK1
BCAS1
CAPN5
MLPH
BCL2L15
CGN
SDR16C5
AGR2
SLC44A4
GALNT5
S100P
TMC7
C1orf116
BAIAP2L1
GPRC5A
PLEK2
KLF5
RHBDL2
MAL2
EPS8L3
CORO2A
FXYD3
CEACAM6
S100A6
AP1S3
KRT19
POF1B
OCIAD2
LGALS3
LAD1
VILL
MET
RHPN2
ERN2
IL1RN
GALNT3
MUC1
KRT8
SGPP2
RAB25
ACSL5
ANXA3
SH3RF2
CTSE
CYP2C18
MACC1
VSIG2
STYK1
GSDMB
EPHA2
FUT2
MTMR11
COL17A1
OSBPL3
MSLN
CYP3A5
TMEM92
LAMB3
ARL14
TJP3
FUT3
CEACAM1
FOXQ1
ST6GALNAC1
HKDC1
CLDN4
RAB27B
S100A14
ELF3
SERINC2
AGR3
TSPAN7
ANXA10
ITGA2
HK2
ECT2
S100A16
EPS8L1
RNF128
TM4SF1
SFTA2
GCNT3
ITGB4
PPARG
KCNN4
PRSS8
CEACAM5
B3GALT5
TSPAN8
TRIM31
PRR15
XDH
SERPINB5
TRIM29
VSIG1
SLC6A14
TMEM45B
RASEF
NMU
FAM83B
CD55
SLC2A1
PHLDA2
ANKRD22
HHLA2
PTK6
IFI27
LAMC2
PTPRR
MBOAT2
SLPI
CXCL12
FERMT1
C19orf33
CYP2S1
RAPGEFL1
TFF1
PLA2G10
MYEOV
PLAC8
ABCC3
ITGB6
CDHR2
SLCO4A1
LGALS4
NR1I2
SFN
TCN1
SLC9A2
GPX2
CA9
LAMA3
HNF4G
EGLN3
MUC13
KRT7
AHNAK2
SCNN1A
AOX1
PDZK1IP1
TMPRSS3
MUC20
ATP10B
ZG16B
TCEAL2
ITGA3
DHRS9
ANLN
NGFR
GJB3
FER1L4
SCEL
SULT1C2
SPDEF
PADI1
KIF1A
CDH3
TMOD1
TFF2
APOBEC1
CLIC3
CYP2C9
ADAM28
CLDN18
MUC4
SLC7A2
PAK3
CAPN9
SULT1B1
LCN2
KLK7
BEX1
FER1L6
MUC17
TNS4
DPT
PPP1R1A
TACSTD2
GDA
KLK10
DKK1
DUOX2
SLC16A12
FAM83A
PSCA
NRCAM
PROM1
GJB2
KLK11
WFDC2
PDK4
CLRN3
CST1
MMP7
HSD17B2
FAM3D
FGFBP1
CHRDL1
PAIP2B
AKR1B10
ADH1B
PCSK1N
PCSK1
HPGD
SPRR3
NPSR1
SPRR1B
MMP11
BTNL8
CXCL5
SFRP1
ABCC8
SPRR1A
MMP1
MUC5B
CCL20
SCG3
ADIPOQ
SLC26A9
TFF3
OGN
GNMT
FABP4
GABRP
KRT17
PI3
REG4
C7
CELP
SCGN
TMED6
UCA1
DUOXA2
KLK6
DMBT1
PIGR
COL10A1
PCSK2
CTRL
COL11A1
NMUR2
MUC16
CDH17
CHGB
OLFM4
SERPINB3
AQP8
RBPJL
KRT6A
IAPP
CXCL17
SERPINI2
ERP27
CELA2A
CELA2B
PLA2G2A
SYCN
PPY
PNLIPRP1
PDIA2
CTRC
PNLIPRP2
PGC
CRP
CEL
PLA2G1B
PNLIP
CLPS
CPA2
REG3G
CELA3A
CPA1
GP2
CPB1
CTRB2
